# Supplementary material
Source: PubMed Central journal article supplement (PMC4892221)
Supplement: Supp_Fig1.pdf [file Supp_Fig1.pdf]

## Supplemental Data

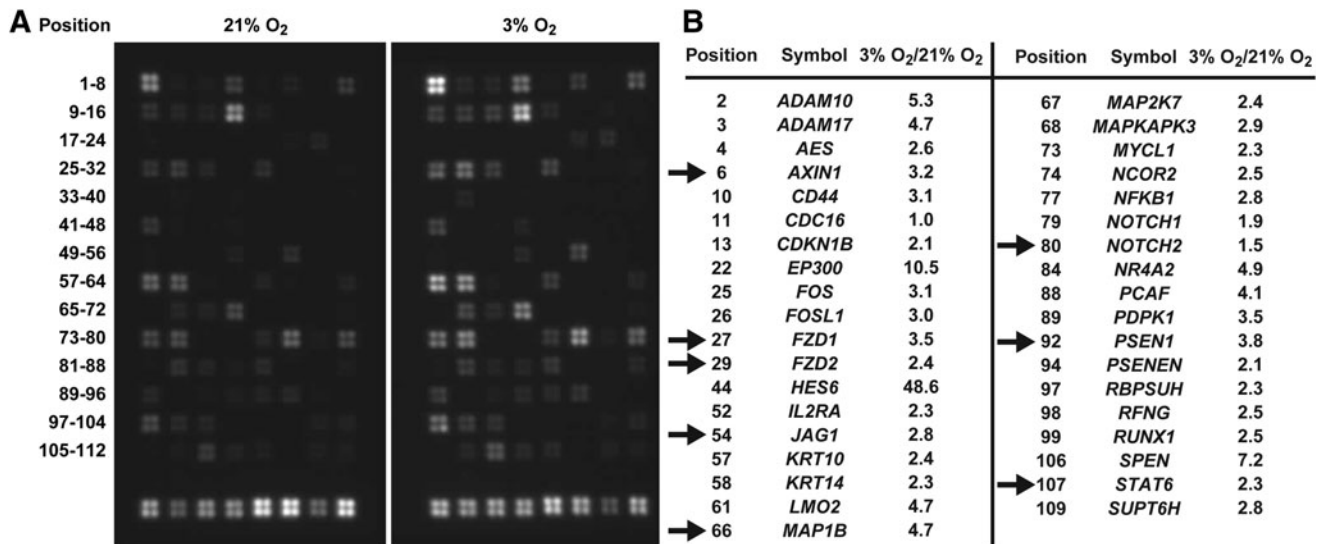

**SUPPLEMENTARY FIG. S1.** (A) Microarray analysis of marrow-isolated adult multilineage inducible cells at 3% and 21% O<sub>2</sub>. *Left panel* shows hybridization with the RNA sample from cells grown in 21% O<sub>2</sub>. *Right panel* shows hybridization with the RNA sample from cells grown in 3% O<sub>2</sub>. The *bottom-most row* of each panel consists of housekeeping genes and the *row* directly above it is the negative controls. (B) Table displays intensity of hybridization as 3% O<sub>2</sub>/21% O<sub>2</sub>. Genes highlighted with an *arrow* were confirmed to be upregulated at 3% O<sub>2</sub> after RT-qPCR.
